# Supplementary material
Source: Springer Nature journal article supplement (https://www.springermedizin.de/resource/supplementary/12885_2007_1054_MOESM2_ESM.pdf/9470990)

### Cumulative distribution of age of onset NHL

Men

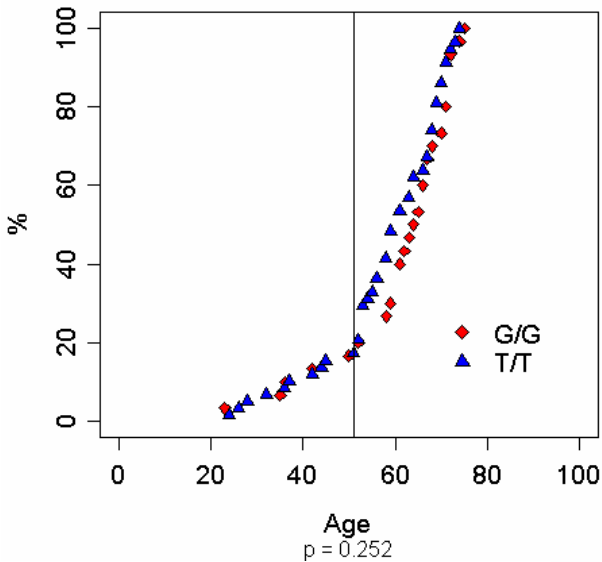

Women

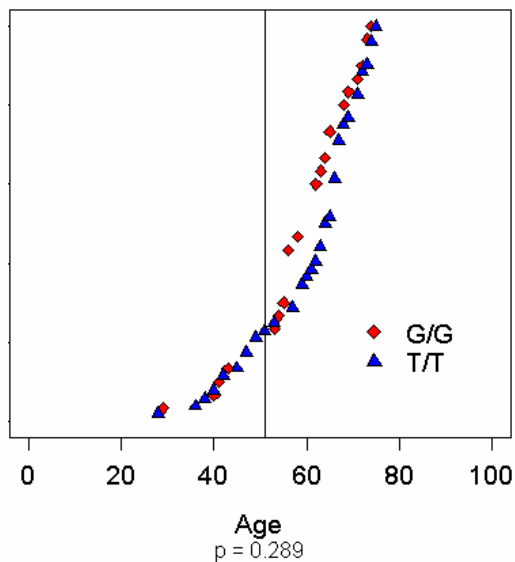

### Cumulative distribution of age of onset DLBCL

Men

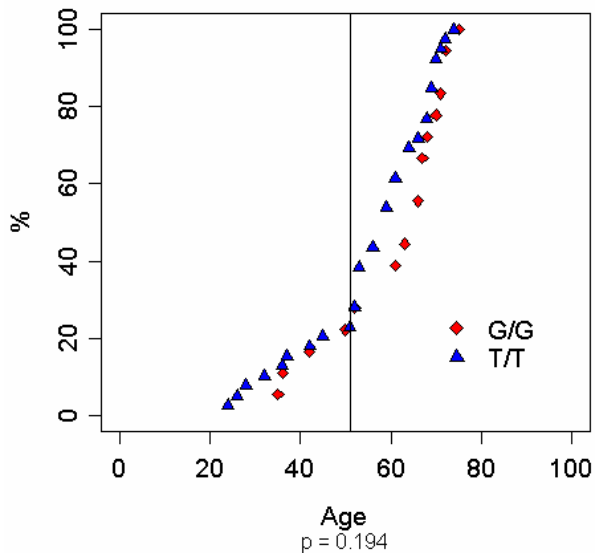

Women

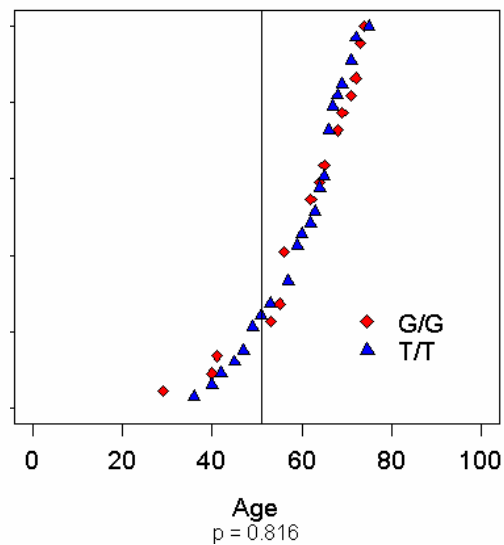

Supplement: MOESM2 [file 9470990]
